# Supplementary material
Source: PubMed Central journal article supplement (PMC3212848)
Supplement: NIHMS329844-supplement-1_si_001.pdf [file NIHMS329844-supplement-1_si_001.pdf]

# Supporting Information: Designed Post-Self-Assembly Structural and Functional Modifications of a Truncated Tetrahedron

*Yao-Rong Zheng\**, *Wen-Jie Lan*, *Ming Wang*, *Timothy R. Cook*, and *Peter J. Stang\**

Department of Chemistry, University of Utah, 315 South 1400 East, RM 2020, Salt Lake City, Utah,  
84112

E-mail: [stang@chem.utah.edu](mailto:stang@chem.utah.edu), [zhengyaorong@gmail.com](mailto:zhengyaorong@gmail.com)

## Table of Content

|                                                                                                                                    |    |
|------------------------------------------------------------------------------------------------------------------------------------|----|
| 1. $^{31}\text{P}\{^1\text{H}\}$ and $^1\text{H}$ NMR and ESI-MS spectra of the [6 + 4] metal-organic supramolecule <b>3</b> ..... | S2 |
| 2. $^1\text{H}$ NMR spectra of the three-component modified supramolecule <b>5</b> .....                                           | S3 |
| 3. MMFF models of <b>3</b> and <b>5</b> .....                                                                                      | S3 |
| 4. $^1\text{H}$ NMR spectra of the three-component modified supramolecule <b>7</b> .....                                           | S4 |
| 5. MMFF models of <b>7</b> and <b>9</b> .....                                                                                      | S4 |
| 6. $^1\text{H}$ NMR and ESI-MS spectra of the non-functional scaffold <b>9</b> .....                                               | S5 |
| 7. ESI-MS spectra of the ferrocenyl functionalized supramolecule <b>11</b> .....                                                   | S6 |
| 8. $^{31}\text{P}\{^1\text{H}\}$ NMR and ESI-MS spectra of the host-guest complex <b>13</b> .....                                  | S6 |
| 9. Variable temperature $^1\text{H}$ NMR of the host-guest complex <b>13</b> .....                                                 | S7 |
| 10. Experimental details of PGSE NMR measurements.....                                                                             | S8 |
| 11. Electrochemistry analysis of <b>3</b> , <b>9</b> , and <b>11</b> .....                                                         | S9 |

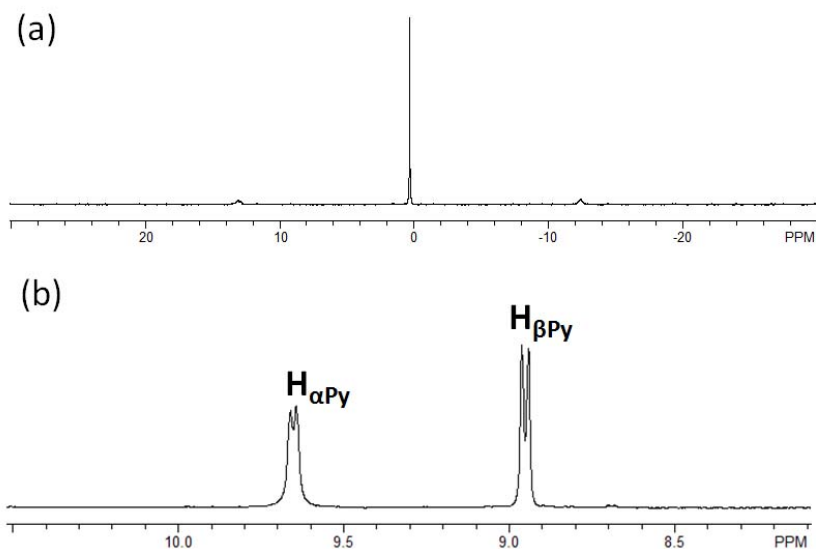

Figure S1. (a)  $^{31}\text{P}\{^1\text{H}\}$  and (b) Partial  $^1\text{H}$  NMR (Acetone- $d_6$ , 300MHz) spectrum of the [6 + 4] metal-organic supramolecule **3**.

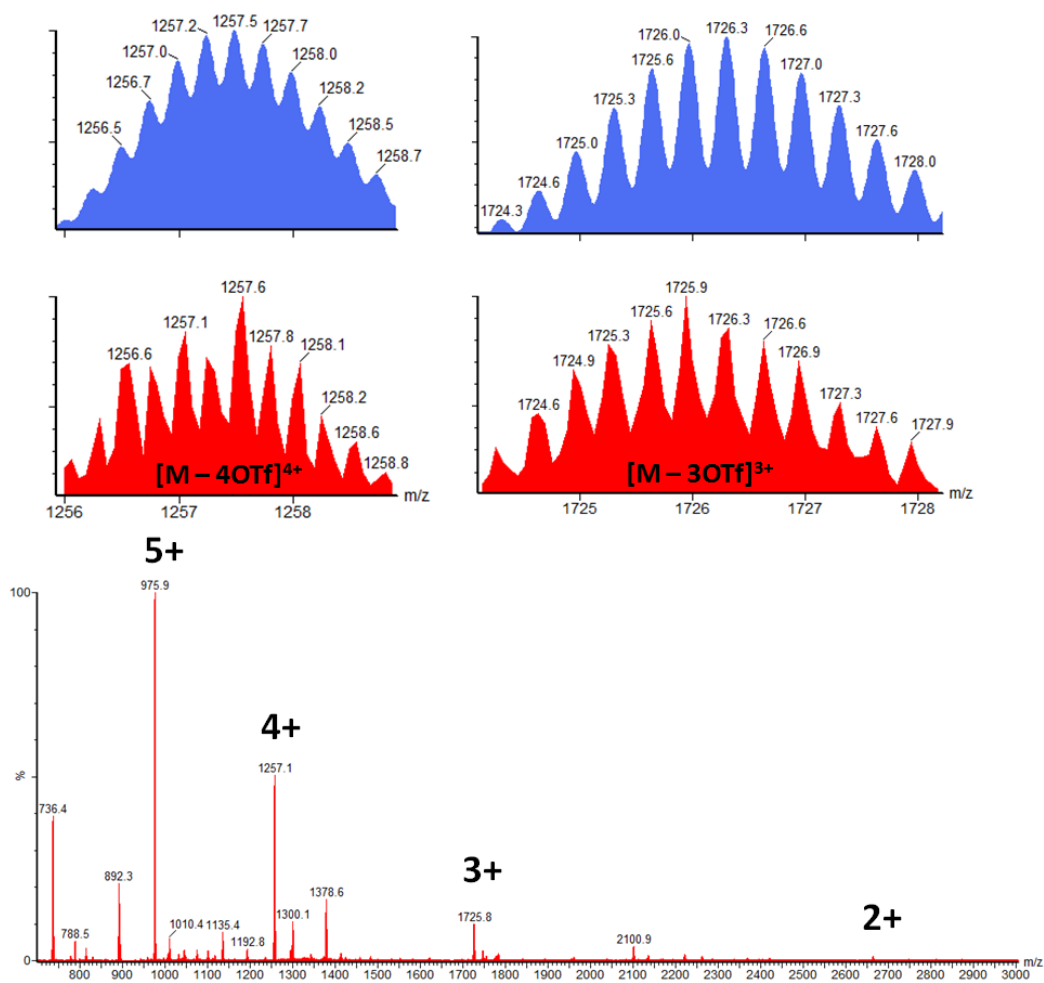

Figure S2. Full ESI MS spectrum of the [6 + 4] metal-organic supramolecule **3**.

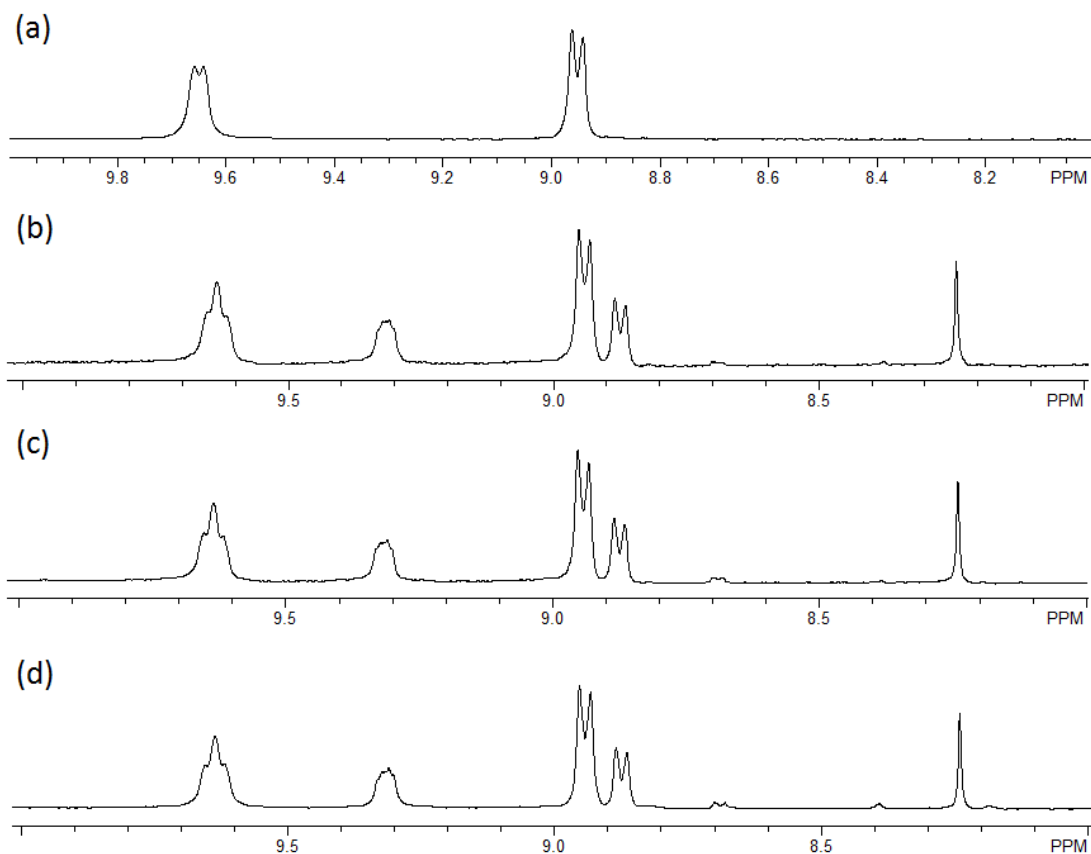

Figure S3. (a)  $^1\text{H}$  NMR spectrum (Acetone- $d_6$ , 300 MHz) of the discrete [6 + 4] metal-organic supramolecule **3**; (b and c)  $^1\text{H}$  NMR spectra of component substitution of **3** to **5**; (d)  $^1\text{H}$  NMR spectrum of self-assembly of **5** by individual molecular components.

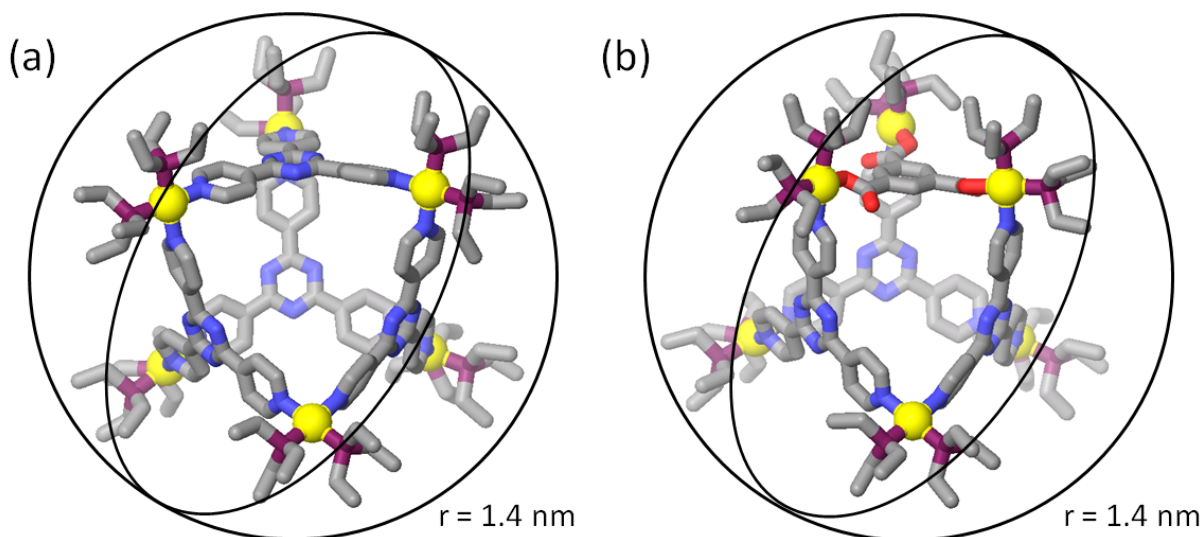

Figure S4. MMFF models of (a) the discrete [6 + 4] metal-organic supramolecule **3** and (b) the three-component modified supramolecule **5**.

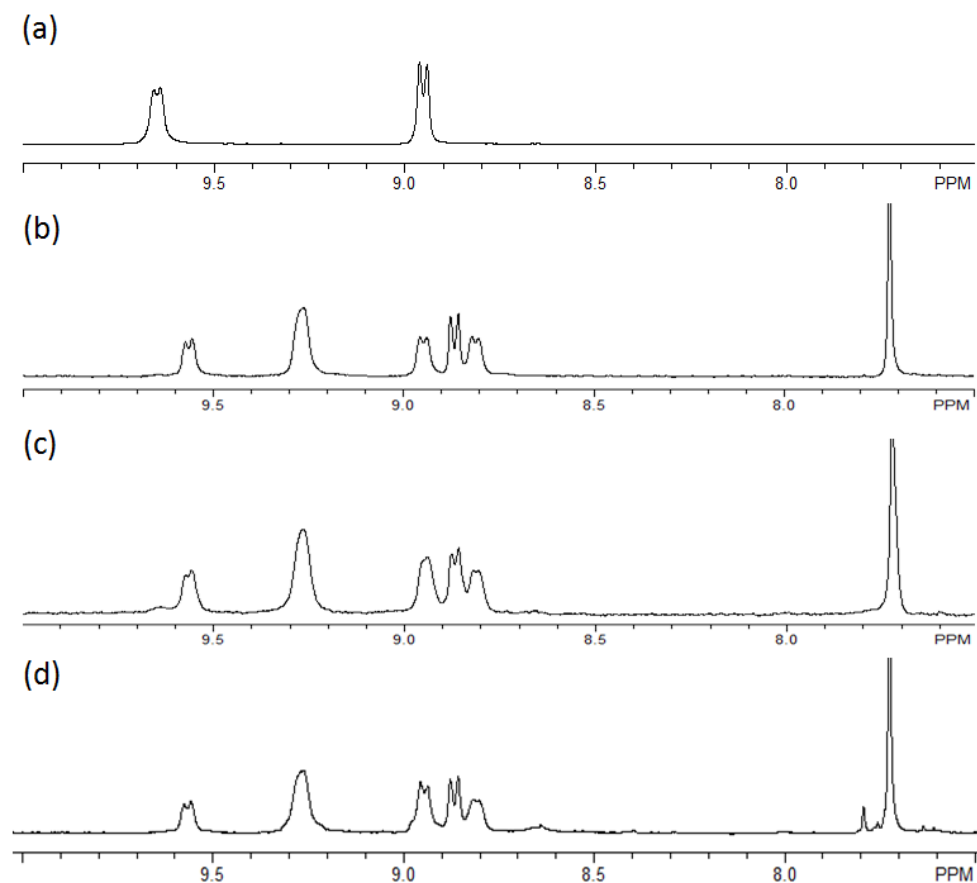

Figure S5. (a)  $^1\text{H}$  NMR spectrum of the discrete [6+4] metal-organic supramolecule **3**; (b and c)  $^1\text{H}$  NMR spectra of component substitution of **3** to **7**; (d)  $^1\text{H}$  NMR spectrum of self-assembly of **7** by individual molecular components.

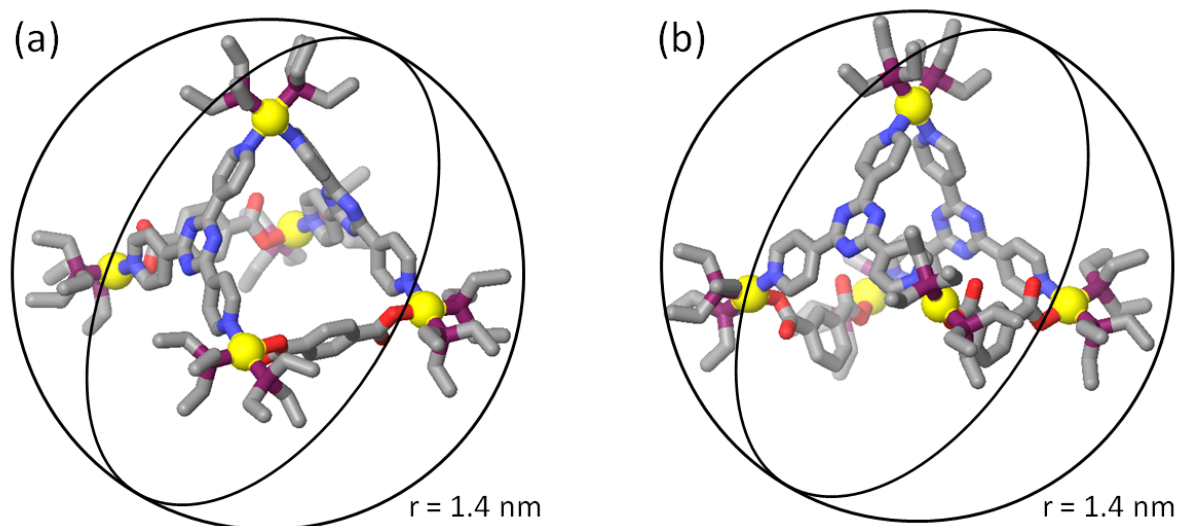

Figure S6. MMFF models of (a) the structurally modified supramolecule **7** and (b) the non-functional scaffold **9**.

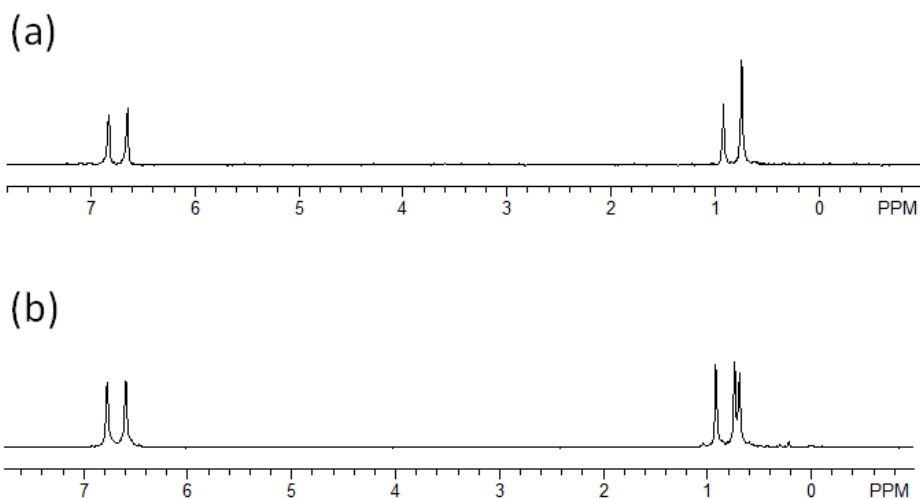

Figure S7.  $^{31}\text{P}\{^1\text{H}\}$  NMR (Acetone- $d_6$ , 300MHz) spectra of the non-functional scaffold **9** (a) and the ferrocenyl functionalized supramolecule **11** (b).

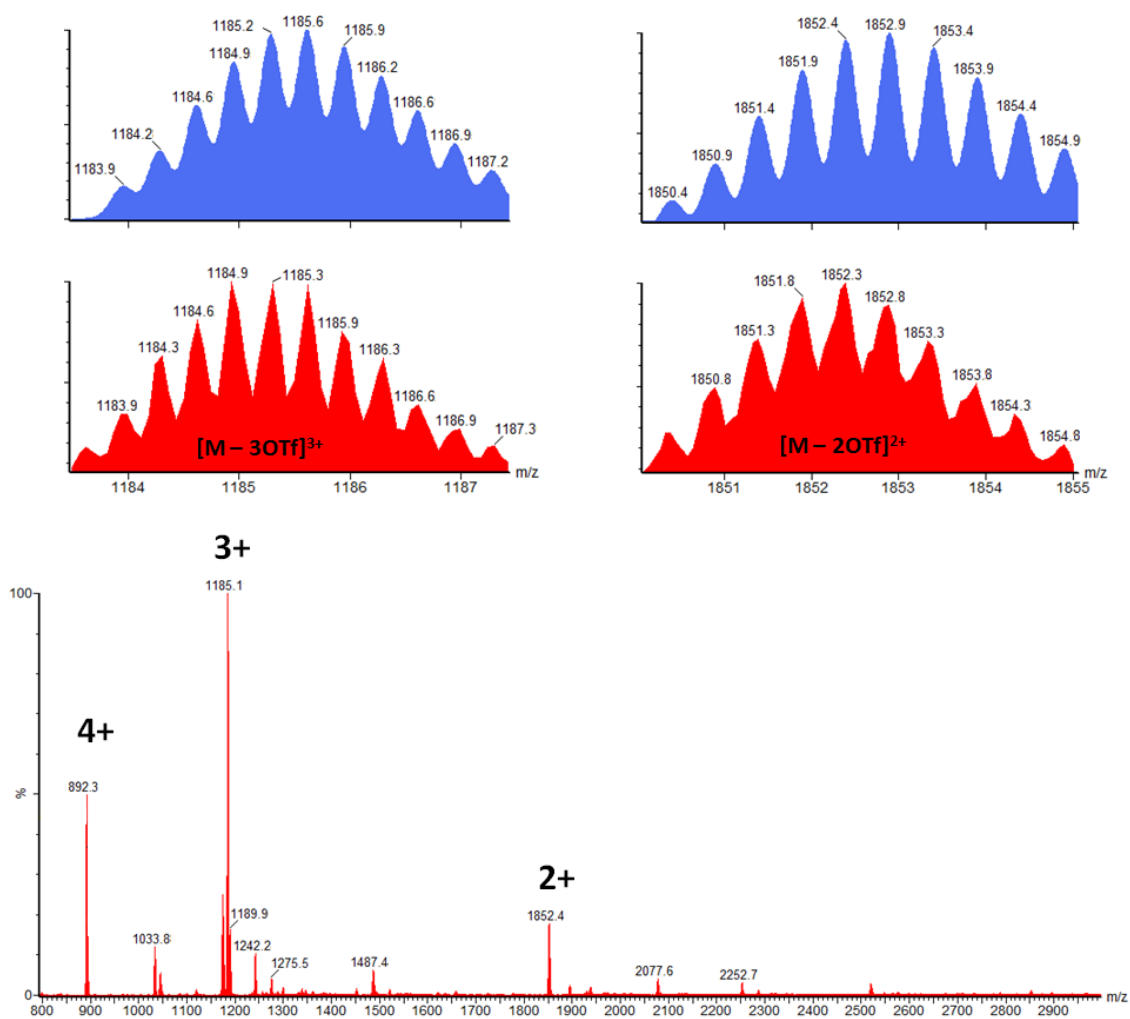

Figure S8. Full ESI-MS spectrum of the triflate salt of non-functional scaffold **9**.

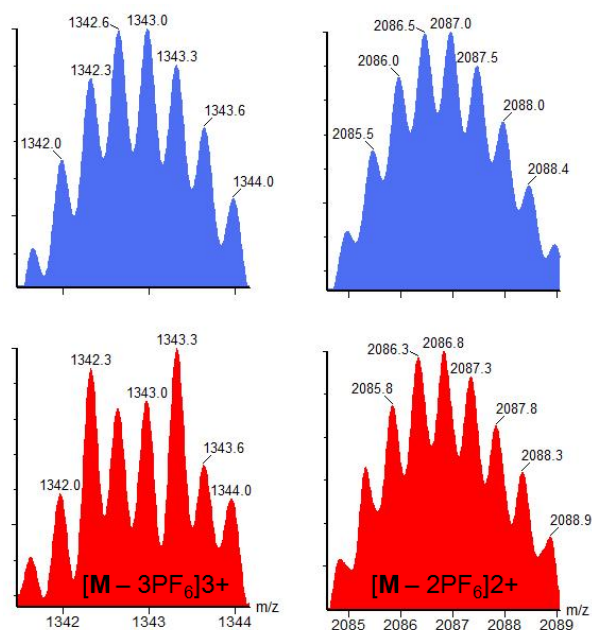

Figure S9. Calculated (top, blue) and experimental (bottom, red) isotopically resolved ESI-MS spectra of the  $\text{PF}_6$  salt of ferrocenyl functionalized supramolecule **11**.

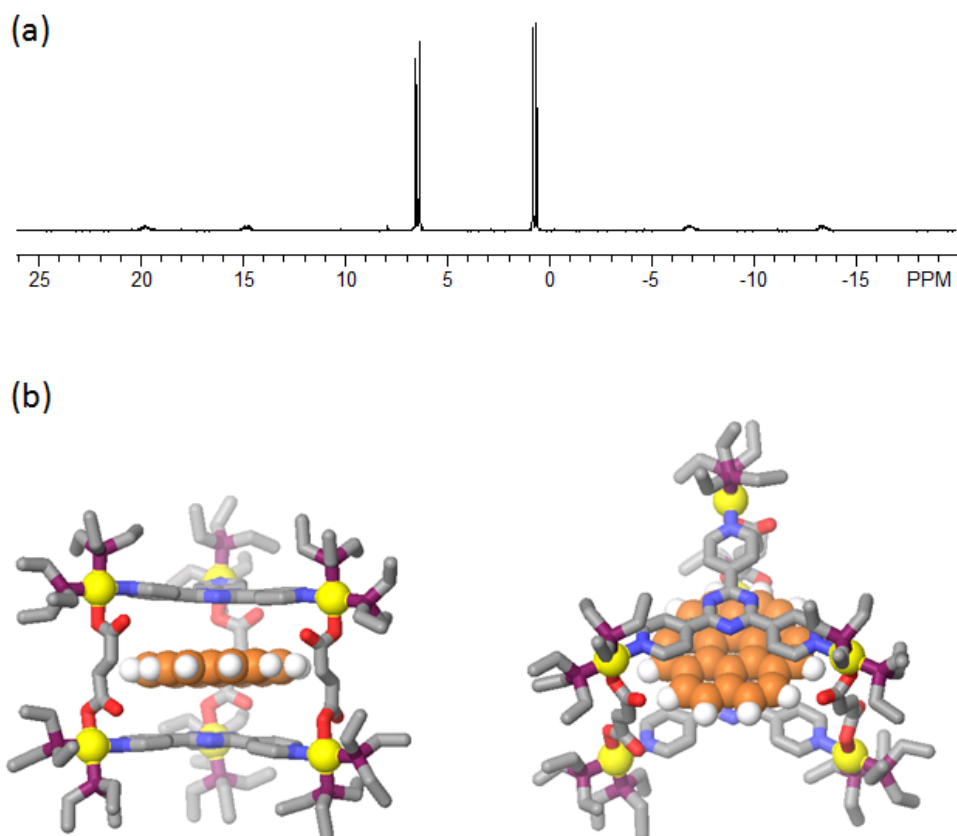

Figure S10. (a)  $^{31}\text{P} \{^1\text{H}\}$  NMR (Acetone- $d_6$ , 300MHz) spectrum of the host-guest complex **13** and (b) different views of the MMFF model of **13**.

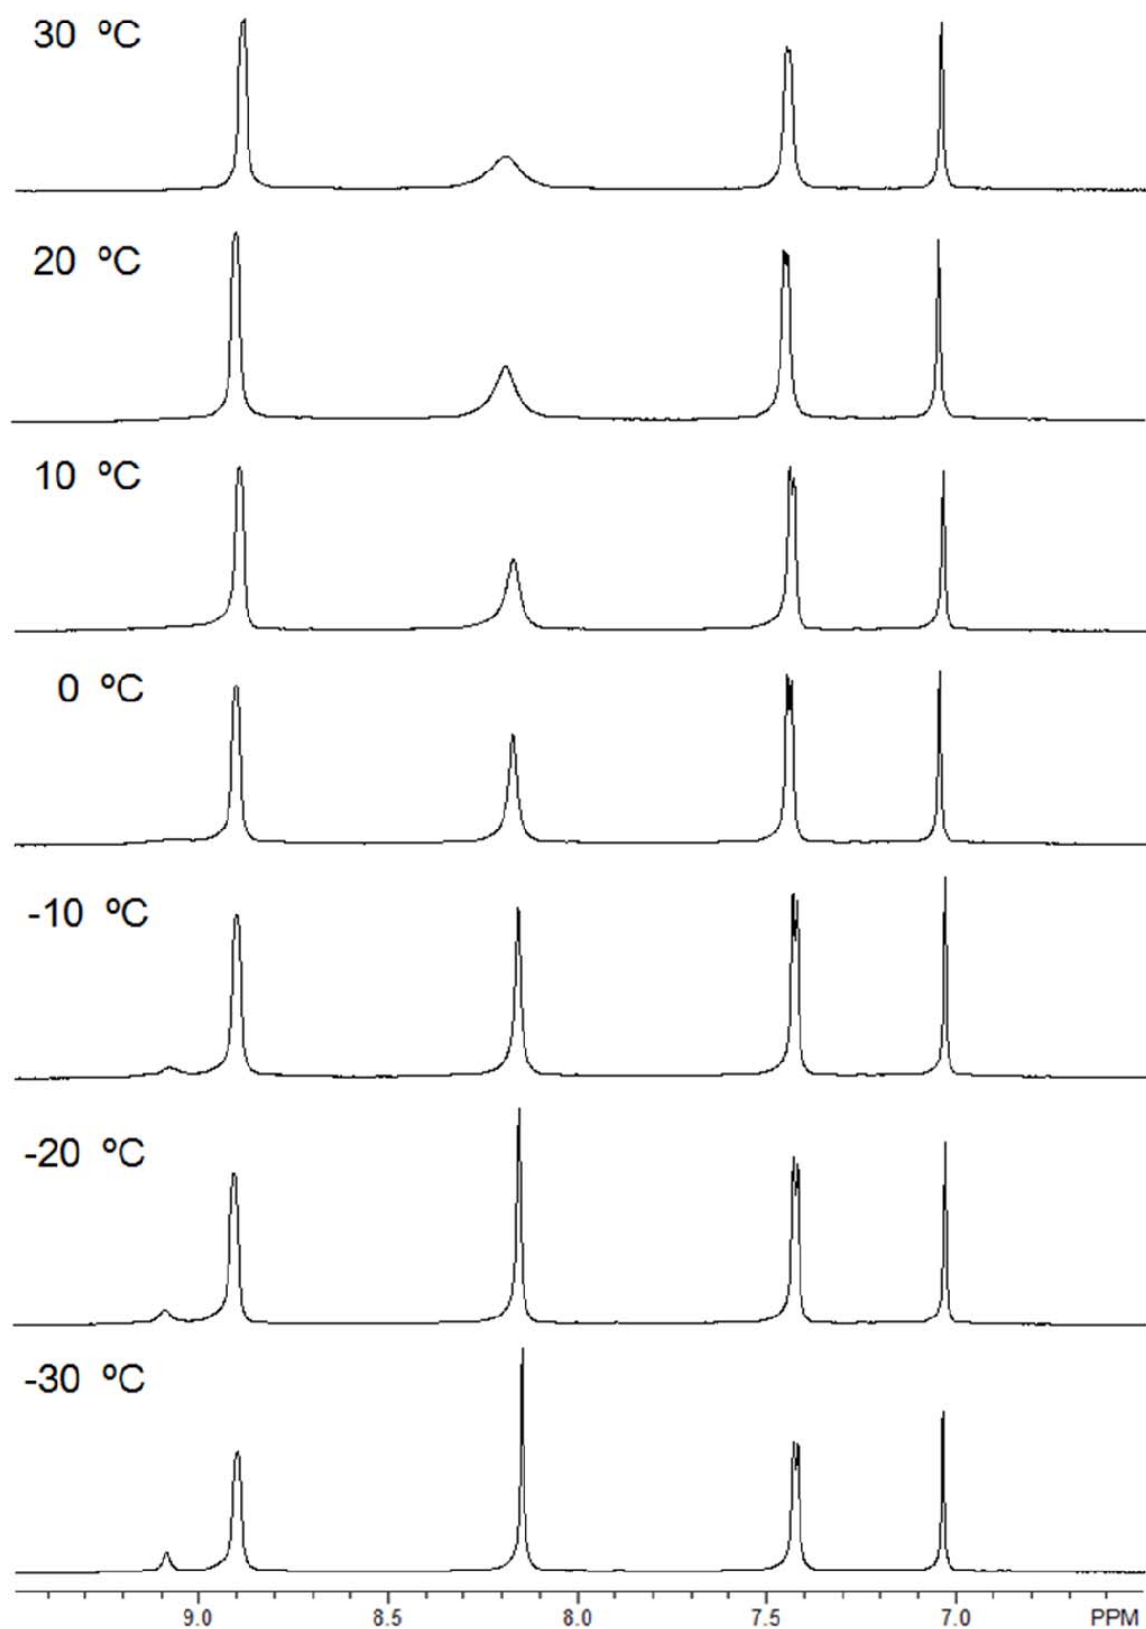

Figure S11. Variable temperature  $^1\text{H}$  NMR (Acetone- $d_6$ , 500MHz) spectra of the host-guest complex **13**.

## Experimental details for the Pulsed Field Gradient Spin Echo (PGSE) NMR measurements

Pulsed gradient spin-echo (PGSE) NMR diffusion measurements were done by pulse-sequence method developed by Stejskal and Tanner:

$$\ln(I/I_0) = \gamma_x^2 \delta^2 G^2 (\Delta - \delta/3) D$$

$\gamma_x$ : Gyromagnetic ratio of the x-nucleus

$\delta$ : Length of the gradient pulse

G: Gradient strength

$\Delta$ : Delay between the midpoints of gradients

D: Diffusion coefficient

**Temp:** 298K

**Instrument:** Inova 500 MHz

**Stokes-Einstein Equation:** The molecular size is obtained from the diffusion coefficient via the Stokes-Einstein equation shown below:

$$D = k_B T / 6\pi\eta r$$

$k_B$ : Boltzmann constant

T: Absolute temperature

r: Hydrodynamic radius of the species under investigation

D: Diffusion coefficient

**Gradient Calibration:** The gradient strengths need to be carefully calibrated to obtain accurate D values to fit equation (1). Gradient strengths were calibrated using the width (in Hz) of a sample of known length along the NMR-tube (Z) axis, back-calculation of the coil constant from a diffusion experiment on D<sub>2</sub>O using D = 1.9 × 10<sup>-5</sup> cm<sup>2</sup>/s for D<sub>2</sub>O at 298K was used to calculate the gradient strengths of both the probes.

$$D(\mathbf{3}) = (5.37 \pm 0.13) \times 10^{-6} \text{ cm}^2/\text{s}; D(\mathbf{5}) = (5.42 \pm 0.16) \times 10^{-6} \text{ cm}^2/\text{s};$$

$$D(\mathbf{7}) = (5.46 \pm 0.12) \times 10^{-6} \text{ cm}^2/\text{s}; D(\mathbf{9}) = (5.25 \pm 0.09) \times 10^{-6} \text{ cm}^2/\text{s};$$

$$D(\mathbf{11}) = (4.38 \pm 0.18) \times 10^{-6} \text{ cm}^2/\text{s}; D(\mathbf{13}) = (5.50 \pm 0.18) \times 10^{-6} \text{ cm}^2/\text{s}.$$



## Electrochemistry analysis of **3**, **9**, and **11**

All electrochemical measurements were performed in a Faraday cage using a Pine Instrument Co. RDE3 potentiostat/waveform generator, or using a Dagan Cornerstone Chem-Clamp potentiostat combined with the RDE3 waveform generator. These instruments were interfaced to a computer through a PCI 6251 data acquisition board (National Instruments). Voltammetric curves and current-time data were recorded using in-house virtual instrumentation written in LabVIEW 8.0 (National Instruments).

### (a) Cyclic voltammetry

The working electrode was a 0.3 mm diameter Pt disk shrouded in glass. A Ag/AgCl and Pt mesh electrode were used as the reference electrode and auxiliary electrode, respectively. Voltammetric experiments on **3** and **9**, Figure S12, show that these molecules are not electrochemically active in acetone within the voltage range examined.

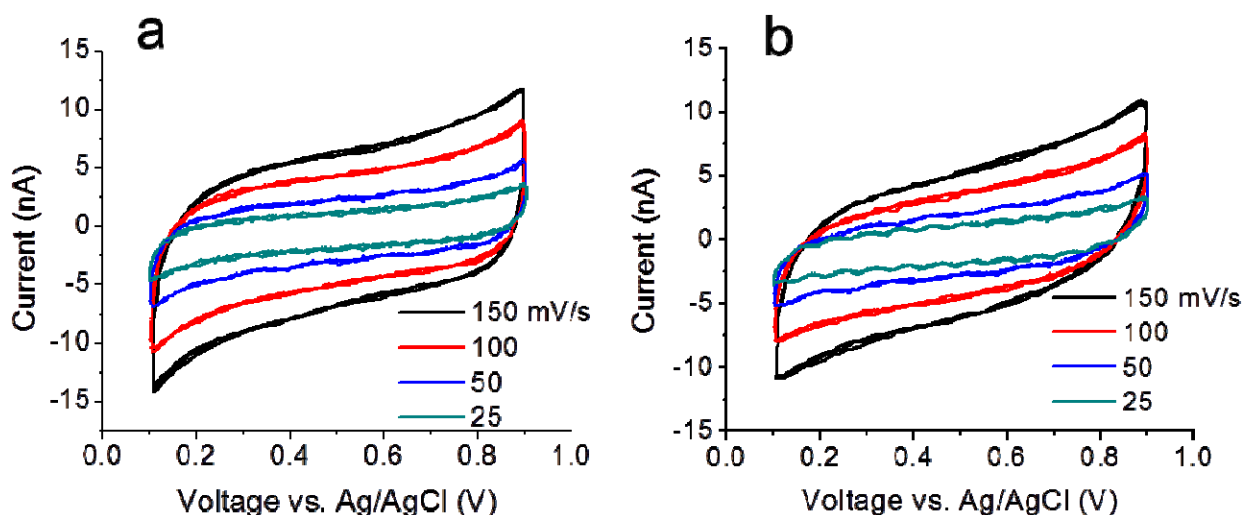

Figure S12. Cyclic voltammetry of (a) **3** and (b) **9** at different scan rates (25-150 mV/s) at a ~0.3 mm diameter Pt electrode. Solution: 0.61 mM **3** and 0.60 mM **9** in acetone containing 0.1 M *n*-Bu<sub>4</sub>NPF<sub>6</sub>, respectively.

(b) Steady-state electrochemical measurements

Two-electrode steady-state voltammetric measurements of **11** (0.61 mM) in acetone containing 0.1 M *n*-Bu<sub>4</sub>NPF<sub>6</sub> were performed using a ~25 μm diameter Pt microdisk electrode as the working electrode and a Ag/AgCl electrode as the combined auxiliary/reference electrode. The radius of the Pt microdisk was provided by the Pt wire manufacturer and further verified from the voltammetric limiting current ( $i_{lim} = 4nFDca$ ) for the oxidation of ferrocene. The limiting current for supramolecule is given by:<sup>1</sup>

$$i_{lim} = 4nFDca\theta_{sites} \quad (S11)$$

where  $n$  is the number of electrons transferred per ferrocene (= 1),  $F$  is Faraday's constant,  $D$  is the diffusion coefficient of the supramolecule,  $c$  is the molecule bulk concentration,  $a$  is the electrode radius, and  $\theta_{sites}$  is the number of ferrocenyl sites per molecule, respectively. A plot of  $E$  vs  $\log[(i_{lim}-i)/i]$  from the steady-state  $i$ - $V$  curves (Figure S13) was used to determine if the oxidation of **11** proceeds by independent serial oxidation of the ferrocenyl sites. The slope of this plot was measured to be -0.0678 V, slightly larger than the theoretical expectation of -0.059 V for oxidation of noninteracting ferrocenyl sites, indicating that the redox species almost react independently of one another.

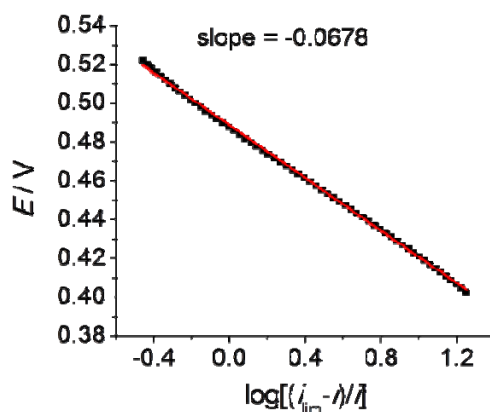

Figure S13. Plot of  $E$  vs.  $\log[(i_{lim}-i)/i]$  from the steady-state voltammetric response.

(c) Chronoamperometry measurements

Chronoamperometry measurements were performed to measure the diffusion coefficient of

**11**. The potential was stepped from a nonreaction potential to a diffusion-controlled potential, and the resulting time-dependent current ( $i_t$ ) was monitored. The time-dependent current is given by<sup>2</sup>:

$$\frac{i_t}{i_{\text{lim}}} = 1 + \frac{2}{\pi^{1.5}} a(Dt)^{-0.5} \quad (\text{SI2})$$

The slope of a plot of  $i_t/i_{\text{lim}}$  vs  $t^{-0.5}$  yields  $D$ . This method has been previously used to determine values of  $D$  for related supramolecules.<sup>3</sup> Figure S14 shows a plot of  $i_t/i_{\text{lim}}$  vs  $t^{-0.5}$  for the oxidation of **11**, yielding  $D$  (eq SI2) and  $\theta_{\text{sites}}$  (eq SI1).

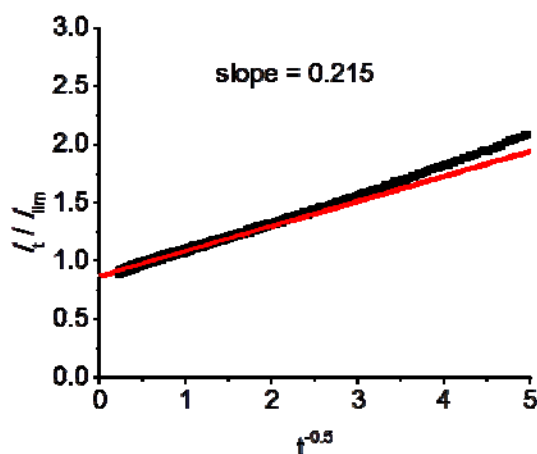

Figure S14. Plot of  $i_t/i_{\text{lim}}$  vs.  $t^{-0.5}$  for the oxidation of **11** in acetone containing 0.1 M  $n\text{-Bu}_4\text{NPF}_6$  using a  $\sim 25\ \mu\text{m}$  diameter Pt disk electrode. The black squares are the experimental data and the red line is the fit line in the long-time region.

- 
1. Bard, A. J.; Faulkner, L. R. *Electrochemical Methods: Fundamentals and Applications*; 2nd ed.; John Wiley & Sons: New York, 2001.
  2. (a) Denuault, G.; Mirkin, M. V.; Bard, A. J. *J. Electroanal. Chem.* **1991**, *308*, 27. (b) Biondi, C.; Bellugi, L. *J. Electroanal. Chem.* **1970**, *24*, 263. (c) Amatore, C.; Azzali, M.; Calas, P.; Jutand, A.; Lefrou, C.; Rollin, Y. *J. Electroanal. Chem.* **1990**, *288*, 45. (d) Mirkin, M. V.; Nilov, A. P. *J. Electroanal. Chem.* **1990**, *283*, 35. (e) Nowinski, S. A.; Anjo, D. M. *J. Chem. Eng. Data* **1989**, *34*, 265.
  3. (a) Ghosh, K.; Hu, J. M.; White, H. S.; Stang, P. J. *J. Am. Chem. Soc.* **2009**, *131*, 6695. (b) Yang, H. B.; Ghosh, K.; Zhao, Y.; Northrop, B. H.; Lyndon, M. M.; Muddiman, D. C.; White, H. S.; Stang, P. J. *J. Am. Chem. Soc.* **2008**, *130*, 839.
